# Supplementary material for: Electrochemical Storage Behavior of a High-Capacity Mg-Doped P2-Type Na2/3Fe1−yMnyO2 Cathode Material Synthesized by a Sol–Gel Method
Source: MDPI journal article supplement (doi:10.3390/gels10010024), 2023-12-27
Supplement: s1 [file s1]

# Electrochemical Storage Behavior of a High-Capacity Mg-Doped P2-Type $\text{Na}_{2/3}\text{Fe}_{1-y}\text{Mn}_y\text{O}_2$ Cathode Material Synthesized by a Sol–Gel Method

Mobinul Islam <sup>1,\*</sup>, Md. Shahriar Ahmed <sup>1</sup>, Daseul Han <sup>1</sup>, Gazi A. K. M. Rafiqul Bari <sup>2</sup> and Kyung-Wan Nam <sup>1,\*</sup>

<sup>1</sup> Department of Energy & Materials Engineering, Dongguk University, Seoul 04620, Republic of Korea; shahriar.che.sust@gmail.com (M.S.A.); endend42@naver.com (D.H.)

<sup>2</sup> School of Mechanical Smart and Industrial Engineering, Gachon University, Seongnam 13120, Republic of Korea; grafiquibari@gachon.ac.kr

\* Correspondence: mobin85@dongguk.edu (M.I.); knam@dongguk.edu (K.-W.N.); Tel.: +82-2-2260-4978 (K.-W.N.)

## Experimental Characterizations

### Structural Characterization

The structure of the as-synthesized P2- $\text{Na}_{2/3}\text{Mg}_{2/9}\text{Fe}_{2/9}\text{Mn}_{5/9}\text{O}_2$  material was studied using X-ray diffraction (Lab XRD, Rigaku X-ray diffractometer) technique. High-resolution Powder X-ray diffraction (HRPD) data were collected at 9B beamline of Pohang Acceleration Laboratory (PAL, South Korea) using a monochromated x-ray with a wavelength ( $\lambda$ ) of 1.5183 Å.

Field emission-scanning electron microscopy (FE-SEM, JEOL-JSM-6700F) coupled with Energy Dispersive Spectroscopy (EDS) was used to examine the morphology and elemental mapping. The chemical composition and surface electronic states were investigated by X-ray photoelectron spectrometry (XPS, NEXSA, Thermo Fisher Scientific, USA). ICP-OES was performed using a Perkin Elmer 3000 DV optical emission plasma spectrometer.

### Electrochemical Characterization

We made the slurry containing the synthesized active material, carbon black (Super P) and polyvinylidene fluoride (PVDF) binder (Sigma-Aldrich) with the weight ratio of 8:1:1 in N-methyl-2-pyrrolidone (NMP). The mixed slurry was cast onto an Al foil current collector. The prepared electrode was dried in a vacuum oven at 80 °C for 12 h prior to use as the working electrode. Then, coin-type half cells (CR2032) were assembled with a Na counter electrode, the prepared working electrode, a glass separator, and an electrolyte composed of 1.2 M  $\text{NaPF}_6$  in ethylene carbonate/dimethyl carbonate (DMC)/ propylene carbonate (PC). (9:9:2 volume ratio). A battery testing system NEWARE (BT7.6.0) was used for the electrochemical test.

### Hard and Soft X-ray Experiments

For ex-situ XRD and XAS analysis, the cells were disassembled in an argon-filled glove box, then the electrodes were carefully washed with propylene carbonate and dimethyl carbonate, and then vacuum sealed in a plastic bag after drying to protect them from exposure to air during transfer to the XRD and XAS chambers. The ex-situ XAS measurements of the Mn and Fe K-edge were performed at 7D, 8C and 10C beamlines of the Pohang Accelerations Laboratories (PAL). The energy was selected using a Si(111) double-crystal monochromator (detuned to ~40% of the maximum intensity). Pure cobalt and nickel metallic foils were used as a reference to calibrate the respective spectra. The energy was scanned from -200 eV below to +1000 eV above the respective edges, and the spectra of the electrodes were recorded in the transmission mode. The XAS data were handled and processed using the ATHENA package. For soft X-ray (sXAS) experiments,

**Citation:** Islam, M.; Ahmed, M.S.; Han, D.; Bari, G.A.K.M.R.; Nam, K.-W. Electrochemical Storage Behavior of a High-Capacity Mg-Doped P2-Type  $\text{Na}_{2/3}\text{Fe}_{1-y}\text{Mn}_y\text{O}_2$  Cathode Material Synthesized by a Sol–Gel Method. *Gels* **2024**, *10*, 24. <https://doi.org/10.3390/10.3390/gels10010024>

Academic Editor: Viorel-Puiu Paun

Received: 30 November 2023

Revised: 23 December 2023

Accepted: 25 December 2023

Published: 27 December 2023

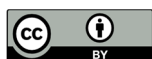

**Copyright:** © 2023 by the authors. Licensee MDPI, Basel, Switzerland. This article is an open access article distributed under the terms and conditions of the Creative Commons Attribution (CC BY) license (<https://creativecommons.org/licenses/by/4.0/>).

samples were transferred to the analysis chamber for testing under ultra-high vacuum. The ex-situ sXAS measurements of the Mn L<sub>2,3</sub>-edge and O K-edge were performed at **10D** and **10A1** beamlines of the Pohang Accelerations Laboratories (PAL). The soft X-ray absorption spectra (sXAS) in TFY and TEY mode were normalized by a gold mesh in the end station.

#### *In-situ XRD*

In situ XRD data were collected at **6D**-UNIST beamline of PAL in a transmission mode using X-ray with  $\lambda = 0.5949$  Å. CR2032 coin cell with a 3 mm hole in the disk/lower/upper caps to allow the penetration of X-rays was used to conduct in situ XRD and cycling was conducted using a 10 mA g<sup>-1</sup> current density.

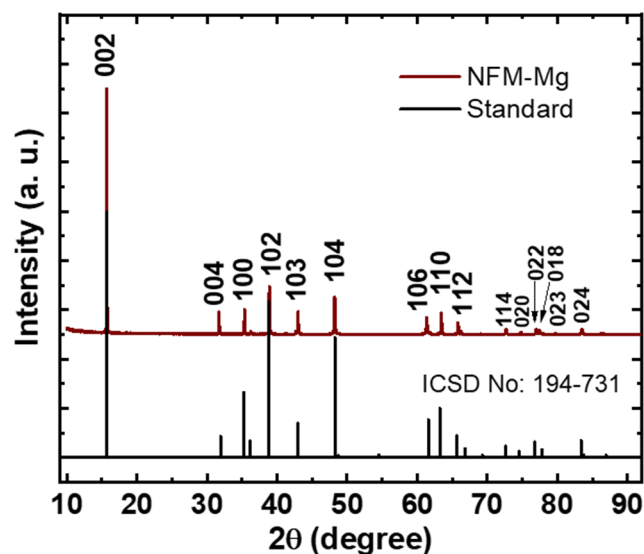

**Figure S1.** High-resolution powder XRD pattern for the P2-Na<sub>2/3</sub>Mg<sub>2/9</sub>Fe<sub>2/9</sub>Mn<sub>5/9</sub>O<sub>2</sub> (NFM-Mg) compound.

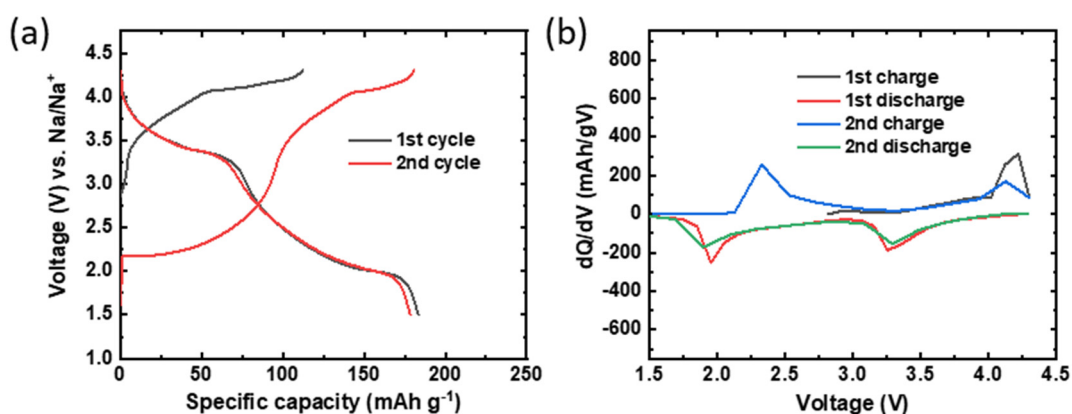

**Figure S2.** (a) Galvanostatic voltage profiles, and (b) dQ/dV curves of the P2-Na<sub>2/3</sub>Fe<sub>1/2</sub>Mn<sub>1/2</sub>O<sub>2</sub> (NFM) cathode material.

**Table S1.** SEM-EDS analysis result for the P2-Na<sub>2/3</sub>Mg<sub>2/9</sub>Fe<sub>2/9</sub>Mn<sub>5/9</sub>O<sub>2</sub> cathode material.

| Element | Weight% | MDL  | Atomic% | Error% |
|---------|---------|------|---------|--------|
| O K     | 36.0    | 0.27 | 56.3    | 7.8    |
| Na K    | 18.3    | 0.4  | 19.9    | 10.3   |
| Mg K    | 5.2     | 0.3  | 5.4     | 11.1   |
| Mn K    | 29.0    | 0.93 | 13.2    | 5.0    |
| Fe K    | 11.5    | 1.39 | 5.1     | 8.9    |
